# Supplementary material for: Pressure-enhanced optoelectronic properties in the two-dimensional metal phosphorus trichalcogenide semiconductor SnPSe3
Source: Royal Society of Chemistry journal article supplement (doi:10.1039/d4tc01532k), 2024-01-01
Supplement: d4tc01532k1.pdf [file d4tc01532k1.pdf]

**Supplementary Materials for**  
**Pressure-enhanced Optoelectronic Properties in Two-dimensional**  
**Metal Phosphorus Trichalcogenides Semiconductor SnPSe<sub>3</sub>**

Mengyao Qi<sup>a,‡</sup>, Meiyang Ye<sup>b,‡</sup>, Shuailing Ma<sup>a,\*</sup>, Junming Feng<sup>a</sup>, Mingyang Du<sup>a</sup>,  
Hongyu Huang<sup>a</sup>, Hao Song<sup>a</sup>, and Tian Cui<sup>a,c,\*</sup>

---

<sup>a</sup> *Institutes of High-Pressure Physical, School of Physical Scientific and Technology, Ningbo University, Ningbo, Zhejiang 315211, China.*

<sup>b</sup> *College of Science, Hainan Tropical Ocean University, Sanya 572022, China*

<sup>c</sup> *Synergetic Extreme Condition High-pressure Science Center, State Key Laboratory of Superhard Materials, College of Physics, Jilin University, Changchun, Jilin 130012, China.*

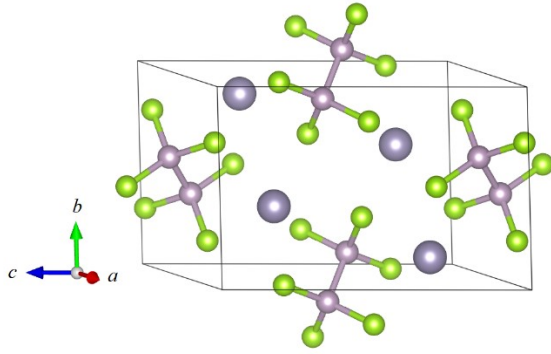

Fig. S1. Schematic crystal structure of SnPSe<sub>3</sub> at ambient conditions. Sn, P, and Se are represented by gray, purple, and green spheres, respectively.

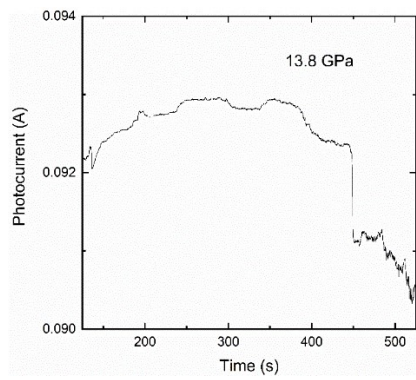

Fig. S2. Photocurrent of SnPSe<sub>3</sub> at 13.8 GPa.

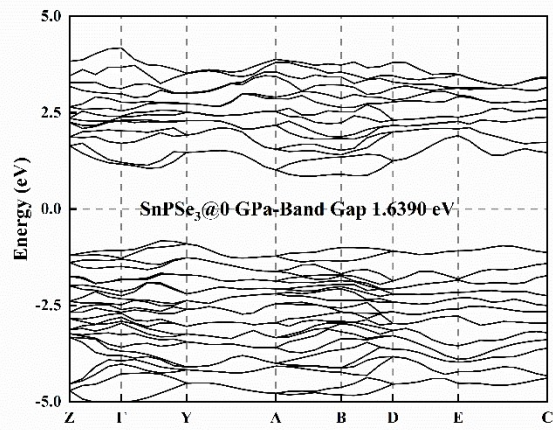

Fig. S3. The calculated band gap of SnPSe<sub>3</sub> at 0 GPa via using HSE method.

Table S1. Calculated Bader charges of Sn, P, and Se in SnPSe<sub>3</sub> at 0 and 10 GPa.

|    | 0 GPa |         |        |        |            | 10 GPa  |        |        |            |
|----|-------|---------|--------|--------|------------|---------|--------|--------|------------|
|    | No.   | X       | Y      | Z      | CHARGE (e) | X       | Y      | Z      | CHARGE (e) |
| Sn | 1     | -0.1624 | 2.8617 | 7.2413 | 13.056     | -0.1539 | 2.9119 | 6.7996 | 13.0602    |
|    | 2     | 0.3331  | 4.7513 | 2.3245 | 13.056     | 0.3595  | 4.4338 | 2.309  | 13.0602    |
|    | 3     | -2.9566 | 6.6682 | 7.1074 | 13.056     | -2.7492 | 6.5847 | 6.8478 | 13.0603    |
|    | 4     | 3.1273  | 0.9448 | 2.4584 | 13.056     | 2.9548  | 0.7609 | 2.2608 | 13.0603    |
| P  | 5     | -0.2721 | 0.8839 | 4.1181 | 4.615      | -0.3563 | 0.7885 | 3.9476 | 4.6934     |
|    | 6     | 0.4428  | 6.7291 | 5.4477 | 4.6108     | 0.5619  | 6.5571 | 5.161  | 4.6848     |
|    | 7     | 3.7325  | 4.6904 | 0.6648 | 4.6107     | 3.6707  | 4.4613 | 0.6223 | 4.6848     |
|    | 8     | -3.5618 | 2.9226 | 8.901  | 4.615      | -3.465  | 2.8843 | 8.4864 | 4.6934     |
| Se | 9     | 0.8721  | 0.0769 | 7.2987 | 6.4451     | 0.9081  | 0.1594 | 7.1115 | 6.4022     |
|    | 10    | -0.7014 | 7.5361 | 2.2671 | 6.4451     | -0.7024 | 7.1862 | 1.9971 | 6.4022     |
|    | 11    | -3.991  | 3.8834 | 7.05   | 6.4451     | -3.8112 | 3.8322 | 6.5359 | 6.4022     |
|    | 12    | 4.1617  | 3.7296 | 2.5158 | 6.4451     | 4.0168  | 3.5134 | 2.5727 | 6.4022     |
|    | 13    | 2.2434  | 6.1559 | 0.5156 | 6.4295     | 2.1089  | 5.9883 | 0.4562 | 6.4408     |
|    | 14    | -2.0728 | 1.4571 | 9.0502 | 6.4295     | -1.9033 | 1.3573 | 8.6524 | 6.4408     |
|    | 15    | 1.2169  | 2.3494 | 4.2673 | 6.4295     | 1.2055  | 2.3155 | 4.1136 | 6.4408     |
|    | 16    | -1.0462 | 5.2636 | 5.2985 | 6.4295     | -0.9998 | 5.0301 | 4.995  | 6.4408     |
|    | 17    | -0.9858 | 5.2956 | 9.1353 | 6.4565     | -0.7464 | 5.2067 | 8.6679 | 6.4076     |
|    | 18    | 1.1565  | 2.3174 | 0.4305 | 6.4565     | 0.952   | 2.1389 | 0.4407 | 6.4076     |
|    | 19    | -2.1331 | 1.4891 | 5.2134 | 6.4565     | -2.1567 | 1.5339 | 4.9795 | 6.4076     |
|    | 20    | 2.3038  | 6.1239 | 4.3524 | 6.4565     | 2.3623  | 5.8117 | 4.1292 | 6.4076     |
